# Supplementary material for: The effect of segregation structure on the colossal permittivity properties of (La0.5Nb0.5)xTi1−xO2 ceramics
Source: Royal Society of Chemistry journal article supplement (doi:10.1039/c7tc05277d), 2018-01-01
Supplement: c7tc05277d1.pdf [file c7tc05277d1.pdf]

### Captions of supplementary figures

**Fig. S1** The frequency dependence of the electric modulus  $M''$  at different temperatures, and the fitting activation energies for polarizations at -150 °C to 80 °C for 5%LNTO ceramic.

**Fig. S2** The frequency dependence of the electric modulus  $M''$  at different temperatures, and the fitting activation energies for polarizations at -150 °C to 80 °C for 2%LNTO ceramic.

**Fig. S3** The frequency dependence of the electric modulus  $M''$  at different temperatures, and the fitting activation energies for polarizations at -150 °C to 80 °C for 1%LNTO ceramic.

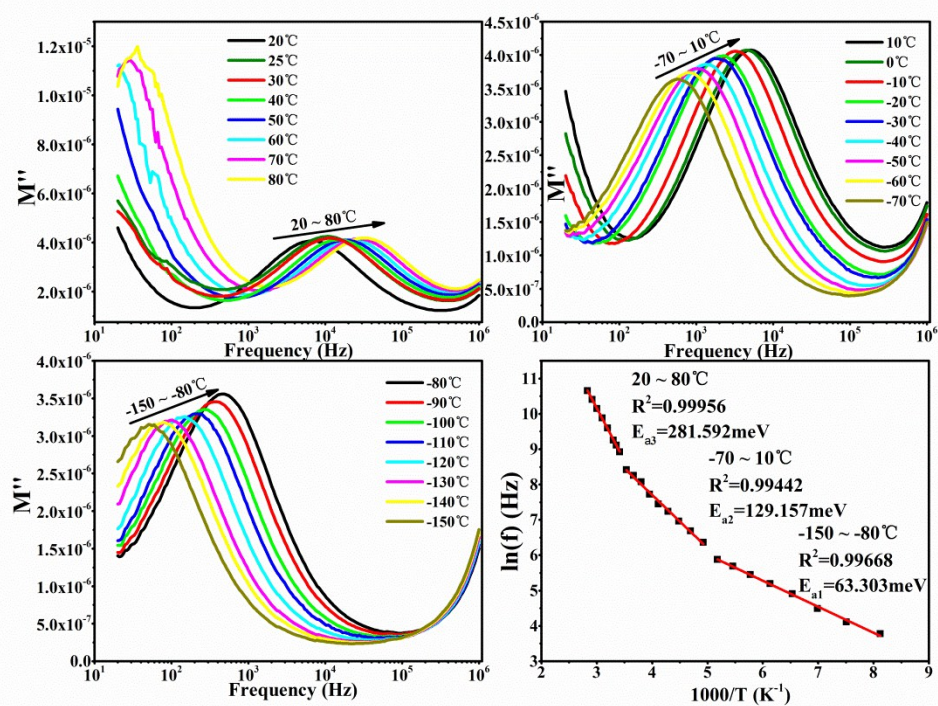

Figure S1

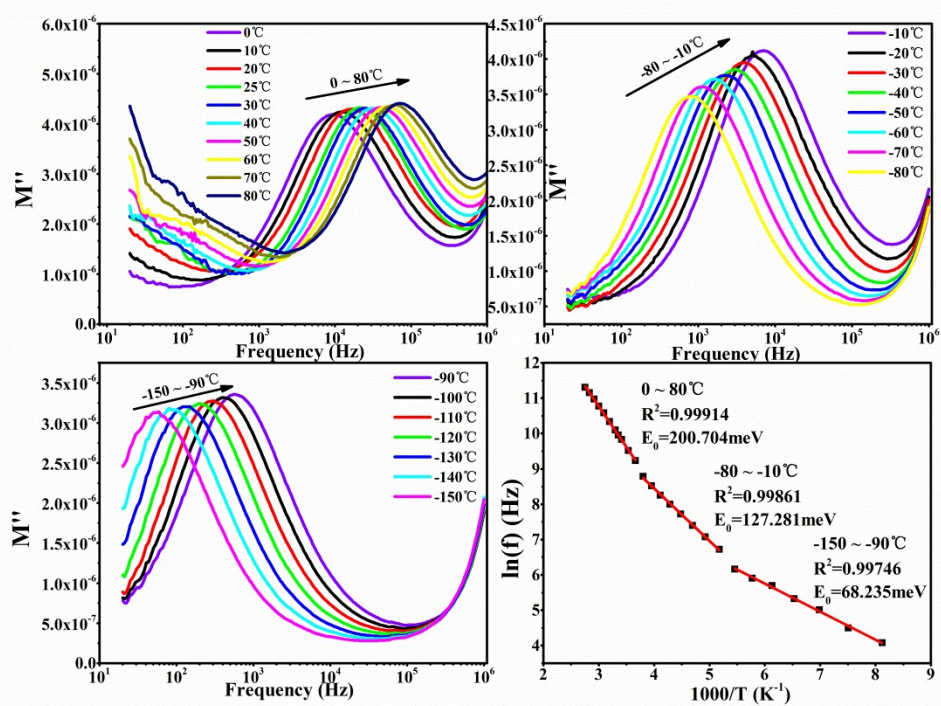

Figure S2

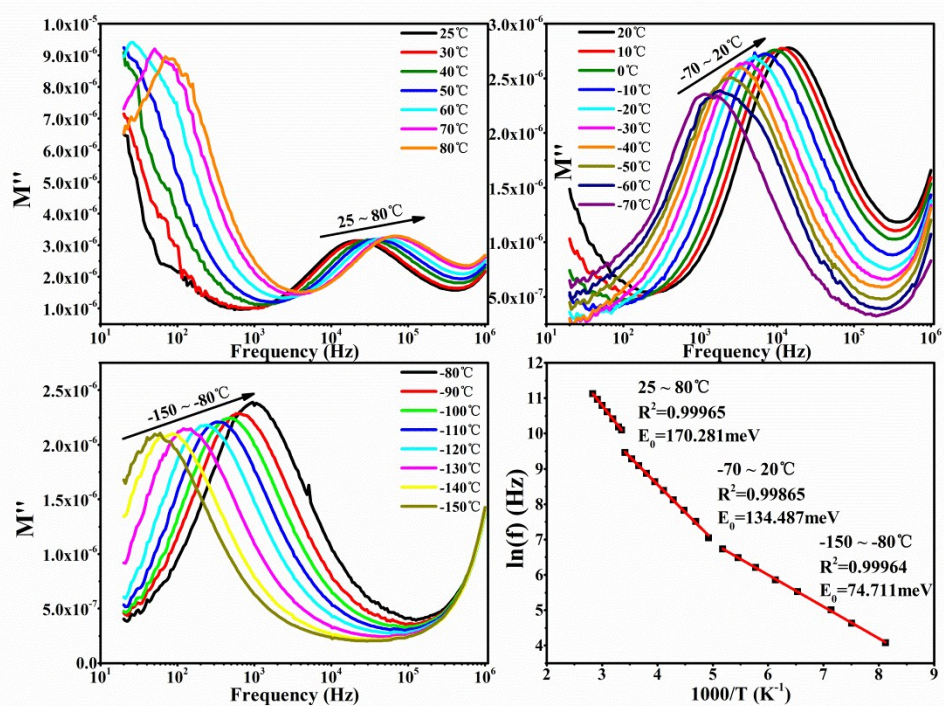

Figure S3
